# Supplementary material for: Distinct Molecular Signatures of Amyloid-Beta and Tau in Alzheimer’s Disease Associated with Down Syndrome
Source: MDPI journal article supplement (doi:10.3390/ijms241411596), 2023-07-18
Supplement: s1 [file s1]

## **Online Supplementary files**

### **Distinct Molecular Signatures of Amyloid-beta and Tau in Alzheimer's Disease Associated with Down Syndrome**

Shojiro Ichimata,<sup>1,2,3</sup> Ivan Martinez-Valbuena,<sup>1</sup> Seojin Lee,<sup>1</sup> Jun Li,<sup>1</sup> Ali M. Karakani,<sup>1</sup> Gabor G. Kovacs<sup>1,2,4,5</sup>

<sup>1</sup> Tanz Centre for Research in Neurodegenerative Disease, University of Toronto, Toronto, ON M5T 2S8, Canada;

<sup>2</sup> Department of Laboratory Medicine and Pathobiology, University of Toronto, Toronto, ON M5S 1A1, Canada

<sup>3</sup> Department of Legal Medicine, Faculty of Medicine, University of Toyama, Toyama 930-8555, Japan

<sup>4</sup> Edmond J. Safra Program in Parkinson's Disease, Rossy Program for PSP Research and the Morton and Gloria Shulman Movement Disorders Clinic, Toronto Western Hospital, Toronto, ON M5T 2S8, Canada

<sup>5</sup> Laboratory Medicine Program, Krembil Brain Institute, University Health Network, Toronto, ON M5G 2C4, Canada

**Supplementary Figure S1.** Representative microphotographs of the quantitative analysis areas in the neocortex and cerebellar molecular layer

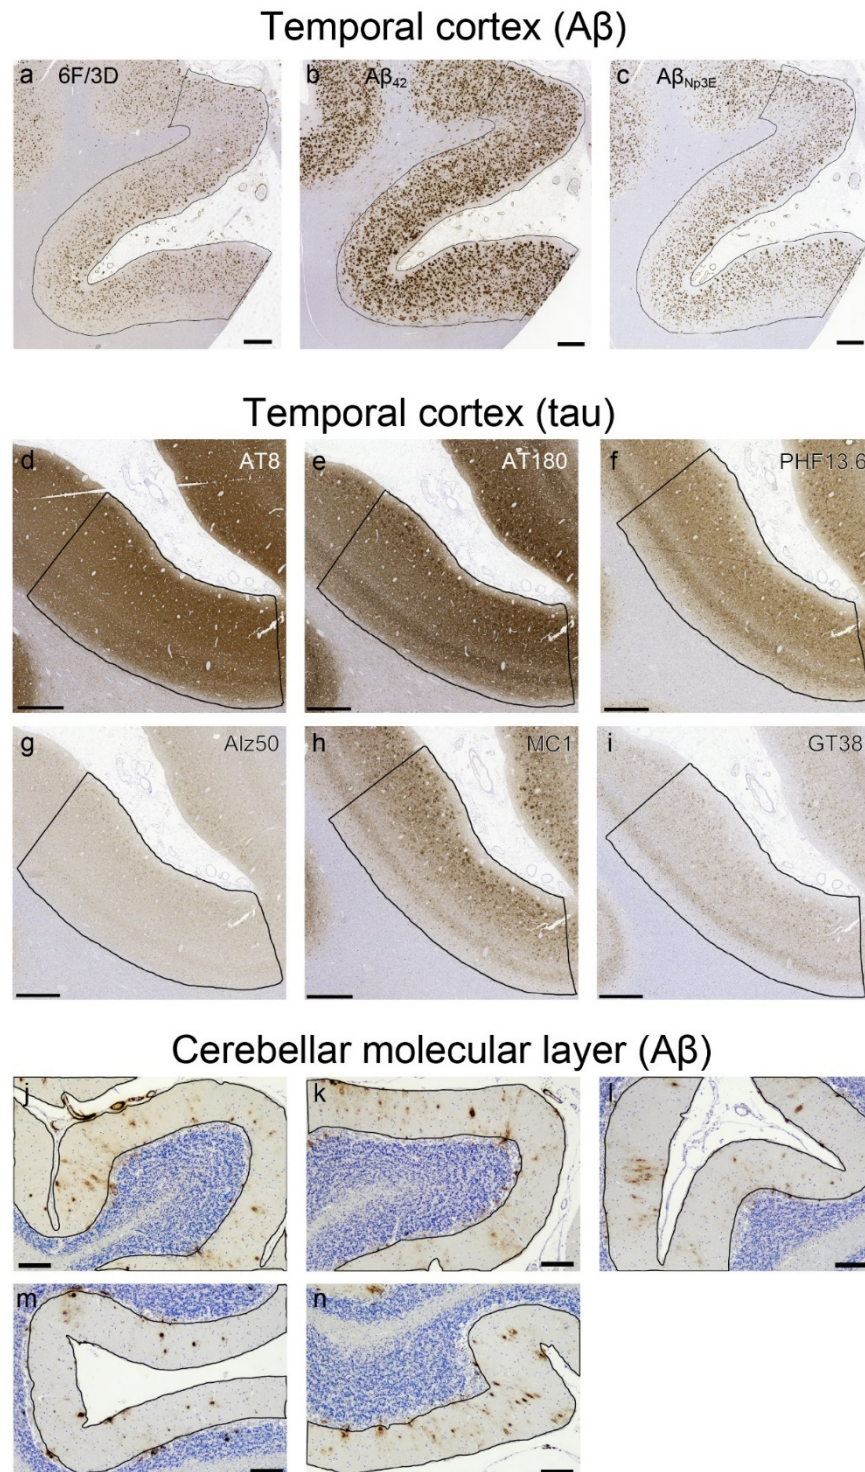

(a–n) DS1. (j–n) Immunohistochemistry for pan-A $\beta$  (6F/3D). In each image, the area surrounded by the black line is the region of interest. In the quantitative analysis of A $\beta$  in the temporal cortex, we evaluated the cortex including the sulcal depth and gyral crests to evaluate all types of A $\beta$  plaques. Scale bar = 1 mm (a–i), 200  $\mu$ m (j–n)



**Supplementary Figure S2.** Representative microphotographs of the quantitative analysis areas in the white matter.

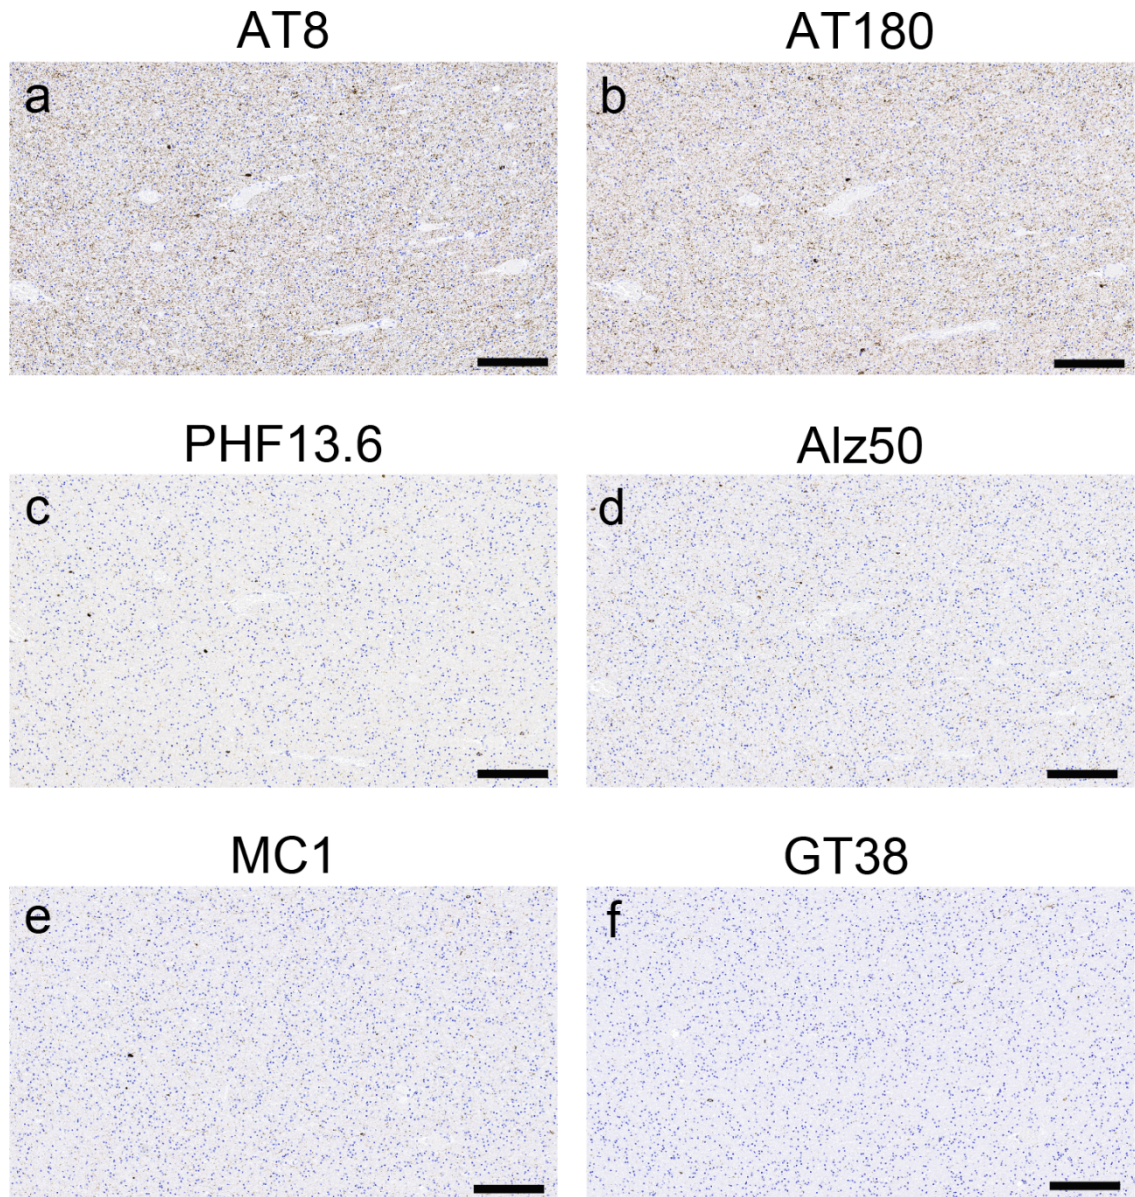

(a–f) Same areas in DS1.

Scale bar = 200  $\mu$ m (a–f)

**Supplementary Figure S3.** Representative microphotographs and a summary of the results of tau seeding assay analysis

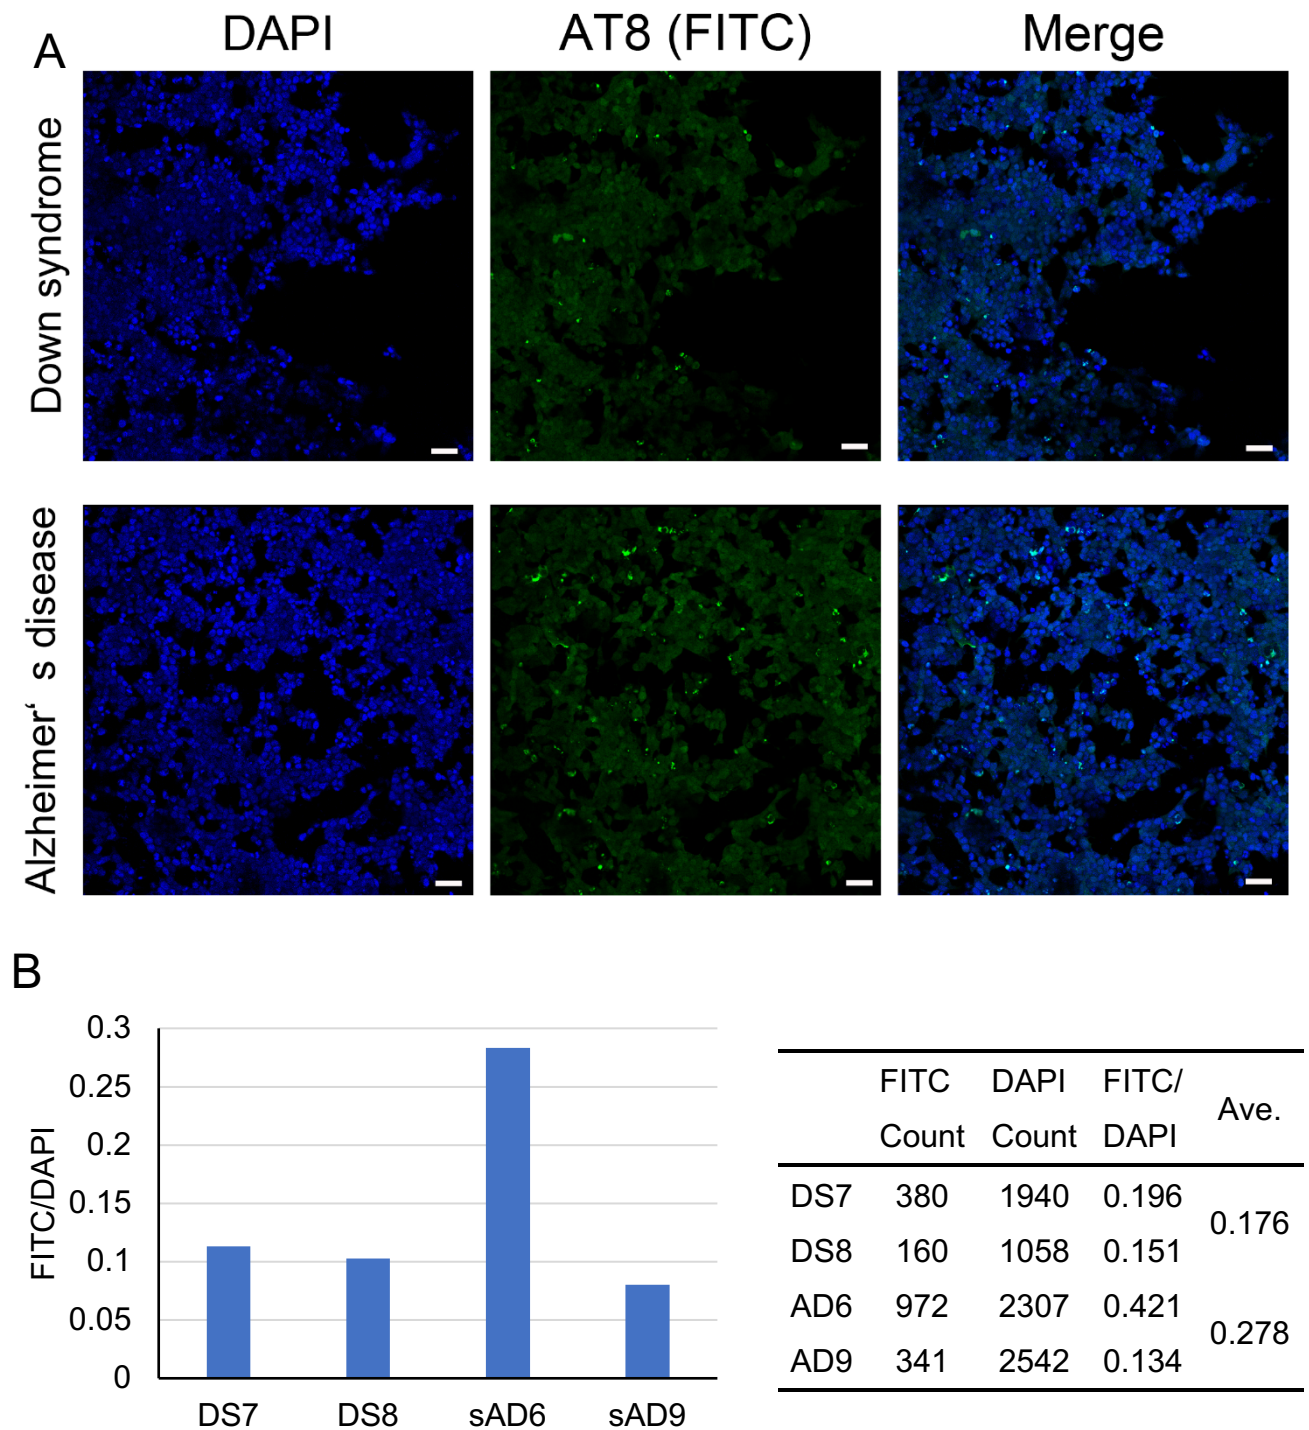

(A) Confocal images. (B) Summary of the results.

In the temporal cortex, both Down syndrome (DS) and sporadic Alzheimer's disease (sAD) cases show the seeding activity consistent with the Braak NFT stage (DS7/DS8, Braak NFT stage 6/5; sAD6/sAD9, Braak NFT stage 6/4). Scale bar = 50  $\mu$ m (A)

**Supplementary Table S1.** All results of quantitative analysis for A $\beta$ 

| Case | Cerebrum (temporal cortex) |            |                         |            |                           |            | Cerebellum (molecular layer) |            |                         |            |                           |            |
|------|----------------------------|------------|-------------------------|------------|---------------------------|------------|------------------------------|------------|-------------------------|------------|---------------------------|------------|
|      | 6F/3D                      |            | A $\beta$ <sub>42</sub> |            | A $\beta$ <sub>Np3E</sub> |            | 6F/3D                        |            | A $\beta$ <sub>42</sub> |            | A $\beta$ <sub>Np3E</sub> |            |
|      | Ave-<br>Size               | P-<br>Load | Ave-<br>Size            | P-<br>Load | Ave-<br>Size              | P-<br>Load | Ave-<br>Size                 | P-<br>Load | Ave-<br>Size            | P-<br>Load | Ave-<br>Size              | P-<br>Load |
| DS1  | 77.2                       | 9.6        | 65.4                    | 28.0       | 119.2                     | 10.7       | 76.2                         | 3.4        | 605.7                   | 55.6       | 155.9                     | 7.4        |
| DS2  | 77.3                       | 16.2       | 99.0                    | 24.7       | 173.2                     | 15.4       | 99.2                         | 3.4        | 419.0                   | 52.1       | 100.5                     | 4.2        |
| DS3  | 63.1                       | 12.1       | 71.0                    | 23.1       | 91.3                      | 11.3       | 168.9                        | 5.1        | 451.4                   | 38.9       | 217.7                     | 4.4        |
| DS4  | 46.1                       | 1.8        | 106.3                   | 11.7       | 46.1                      | 1.8        | 43.4                         | 0.2        | 297.7                   | 20.7       | 132.9                     | 2.0        |
| DS5  | 44.5                       | 4.9        | 38.4                    | 10.7       | 56.8                      | 5.2        | 84.4                         | 2.3        | 535.1                   | 44.9       | 178.9                     | 8.2        |
| DS6  | 59.3                       | 6.9        | 88.8                    | 19.9       | 92.8                      | 8.2        | 80.7                         | 0.7        | 389.4                   | 33.6       | 145.8                     | 4.1        |
| DS7  | 71.4                       | 12.3       | 111.4                   | 26.6       | 145.8                     | 18.2       | 198.2                        | 3.4        | 403.9                   | 33.4       | 167.7                     | 2.1        |
| DS8  | 67.6                       | 1.9        | 100.4                   | 10.2       | 84.0                      | 4.2        | 35.2                         | 0.1        | 491.3                   | 27.7       | 221.3                     | 5.1        |
| DS9  | 42.0                       | 5.5        | 83.0                    | 17.1       | 58.1                      | 6.6        | 86.4                         | 1.6        | 314.1                   | 21.4       | 218.9                     | 8.0        |
| DS10 | 45.2                       | 4.4        | 67.9                    | 11.2       | 107.9                     | 7.0        | 46.8                         | 0.2        | 351.0                   | 24.6       | 134.1                     | 3.3        |
| AD1  | 45.0                       | 8.2        | 56.5                    | 12.0       | 56.5                      | 8.9        | 90.1                         | 1.6        | 477.8                   | 28.4       | 180.6                     | 5.5        |
| AD2  | 52.1                       | 5.7        | 75.5                    | 12.0       | 84.0                      | 6.9        | 41.1                         | 0.1        | 217.3                   | 2.7        | 60.3                      | 0.1        |
| AD3  | 47.2                       | 4.8        | 60.0                    | 7.9        | 67.0                      | 6.0        | 119.2                        | 0.4        | 253.2                   | 1.6        | 199.1                     | 0.8        |
| AD4  | 41.2                       | 4.2        | 65.3                    | 9.4        | 61.2                      | 5.3        | 82.5                         | 0.5        | 505.6                   | 5.7        | 315.8                     | 2.4        |
| AD5  | 35.8                       | 6.6        | 47.0                    | 10.5       | 35.7                      | 6.6        | N/E                          | N/E        | N/E                     | N/E        | N/E                       | N/E        |
| AD6  | 27.0                       | 5.3        | 28.2                    | 5.0        | 45.3                      | 10.1       | N/E                          | N/E        | N/E                     | N/E        | N/E                       | N/E        |
| AD7  | 25.0                       | 4.3        | 28.6                    | 6.9        | 25.5                      | 3.7        | 62.3                         | 0.1        | 400.7                   | 9.5        | 42.9                      | 0.2        |
| AD8  | 24.0                       | 2.1        | 43.5                    | 8.3        | 40.6                      | 4.6        | N/E                          | N/E        | N/E                     | N/E        | N/E                       | N/E        |
| AD9  | 55.0                       | 3.2        | 71.6                    | 4.5        | 124.8                     | 4.0        | 167.0                        | 3.4        | 252.0                   | 7.0        | 216.3                     | 5.1        |
| AD10 | 15.6                       | 2.6        | 29.2                    | 6.1        | 30.6                      | 5.2        | 48.1                         | 0.1        | 368.2                   | 6.3        | 137.7                     | 1.1        |

**Abbreviations:** AD, Alzheimer's disease; Ave, average; DS, Down syndrome; \*N/E, not evaluated; P, plaque

\* N/E means that we did not evaluate the A $\beta$  burden in this case because the case did not show 6F/3D or A $\beta$ <sub>42</sub> or A $\beta$ <sub>Np3E</sub> deposition in the molecular layer.

**Supplementary Table S2.** All results of quantitative analysis for tau

| Case              | AT8  |      | AT180 |      | PHF13.6 |      | Alz50 |     | MC1  |     | GT38 |     |
|-------------------|------|------|-------|------|---------|------|-------|-----|------|-----|------|-----|
|                   | Cx   | WM   | Cx    | WM   | Cx      | WM*  | Cx    | WM  | Cx   | WM  | Cx   | WM* |
| DS1               | 76.7 | 10.9 | 70.7  | 10.1 | 45.6    | 1.9  | 12.6  | 2.6 | 30.6 | 1.6 | 8.6  | 0.3 |
| DS2               | 48.0 | 8.0  | 38.3  | 8.9  | 14.5    | 3.6  | 3.8   | 1.2 | 1.3  | 0.7 | 0.1  | 0.0 |
| DS3               | 74.1 | 5.8  | 70.0  | 4.8  | 43.2    | 1.4  | 6.2   | 1.6 | 6.4  | 0.6 | 6.3  | 0.1 |
| DS4               | 16.9 | 1.0  | 12.4  | 0.9  | 1.0     | 7.3  | 1.3   | 0.3 | 0.4  | 0.2 | 0.0  | 0.1 |
| DS5               | 44.0 | 3.6  | 58.9  | 5.0  | 20.6    | 5.3  | 3.2   | 0.9 | 1.0  | 0.3 | 5.3  | 0.1 |
| DS6               | 74.9 | 4.1  | 73.9  | 4.1  | 24.5    | 6.5  | 5.8   | 0.9 | 4.6  | 0.2 | 0.9  | 0.2 |
| DS7               | 57.9 | 6.8  | 53.5  | 6.6  | 2.9     | 11.8 | 2.8   | 1.0 | 2.1  | 0.4 | 0.2  | 0.1 |
| DS8               | 37.9 | 5.0  | 32.5  | 4.4  | 0.9     | 14.5 | 2.0   | 0.8 | 0.9  | 0.6 | 0.1  | 0.9 |
| DS9               | 77.0 | 5.5  | 66.9  | 5.0  | 36.6    | 2.6  | 9.1   | 0.9 | 8.4  | 0.2 | 6.3  | 0.1 |
| DS10              | 61.3 | 9.5  | 56.6  | 8.4  | 26.8    | 13.1 | 10.1  | 1.6 | 7.1  | 0.6 | 3.5  | 0.1 |
| AD1               | 52.5 | 3.4  | 45.9  | 2.8  | 21.4    | 1.4  | 4.8   | 1.2 | 1.4  | 0.6 | 0.6  | 0.3 |
| AD2               | 52.9 | 2.2  | 46.9  | 2.8  | 24.2    | 5.5  | 3.3   | 0.4 | 6.3  | 0.5 | 0.7  | 0.7 |
| AD3               | 43.7 | 4.6  | 36.5  | 4.0  | 19.4    | 2.4  | 3.3   | 0.9 | 2.9  | 0.8 | 0.1  | 0.0 |
| AD4               | 47.9 | 3.0  | 37.5  | 2.7  | 11.2    | 9.5  | 1.9   | 0.5 | 0.6  | 0.3 | 0.4  | 0.2 |
| AD5               | 65.2 | 2.9  | 56.2  | 3.2  | 38.7    | 1.1  | 6.2   | 0.8 | 2.2  | 0.2 | 2.4  | 0.2 |
| AD6               | 32.7 | 2.6  | 22.7  | 1.8  | 12.5    | 0.6  | 6.0   | 0.8 | 1.8  | 0.3 | 0.6  | 0.0 |
| AD7               | 58.5 | 1.0  | 52.8  | 0.9  | 20.6    | 0.2  | 7.3   | 0.4 | 4.3  | 0.2 | 2.2  | 0.0 |
| AD8               | 47.1 | 1.5  | 42.9  | 1.4  | 21.7    | 1.6  | 1.1   | 0.5 | 0.2  | 0.2 | 0.9  | 0.2 |
| AD9               | 15.3 | 0.5  | 13.7  | 0.6  | 0.2     | 9.7  | 1.0   | 0.1 | 0.4  | 0.2 | 0.0  | 3.7 |
| AD10 <sup>†</sup> | 42.3 | 0.6  | 46.2  | 1.1  | 3.3     | 9.2  | 2.2   | 0.1 | 0.3  | 0.1 | 2.2  | 0.3 |

**Abbreviations:** AD, Alzheimer's disease; Cx, cortex; DS, Down syndrome; WM, white matter

\* Data shown in grey are abnormally high compared to the bright-field observation, which may be due to nonspecific immunoreactivity in the background. These data were excluded from the statistical analysis in this study (GT38). Regarding the results of PHF13.6 in the WM, we did not statistically evaluate them because half of the results were abnormally high.

<sup>†</sup> The results of the tau deposition burden obtained from AD10 were excluded from the statistical analysis of tau pathology.
